# Supplementary material for: A signal processing method for alignment-free metagenomic binning: multi-resolution genomic binary patterns
Source: PubMed Central journal article supplement (PMC6377666; doi:10.1038/s41598-018-38197-9), 2019-02-15
Supplement: 41598_2018_38197_MOESM1_ESM.pdf [file 41598_2018_38197_MOESM1_ESM.pdf]

# A signal processing method for alignment-free metagenomic binning: multi-resolution genomic binary patterns

Samaneh Kouchaki<sup>1,2</sup>, Avraam Tapinos<sup>1</sup>, David L Robertson<sup>1,3</sup>

<sup>1</sup>Evolution and Genomic Sciences; School of Biological Sciences; Faculty of Biology, Medicine and Health; The University of Manchester; Manchester; M13 9PT; UK.

<sup>2</sup>Department of Engineering Science; University of Oxford; OX3 7DQ; UK.

<sup>3</sup>MRC-University of Glasgow Centre for Virus Research; Glasgow; G61 1QH; UK.

## 10 Genomes Metagenomic Data

**Supplementary Table 1** The simulated 10 genomes data used in Results and Discussion.

| Bacterial species                                    |
|------------------------------------------------------|
| <i>Rhodopseudomonas palustris</i> CGA009             |
| <i>Neisseria meningitidis</i> MC58                   |
| <i>Bacillus clausii</i> KSM-K16                      |
| <i>Staphylococcus aureus</i> subsp. aureus NCTC 8325 |
| <i>Methanococcus maripaludis</i> C7                  |
| <i>Lawsonia intracellularis</i> PHE/MN1-00           |
| <i>Cyanothece</i> sp. ATCC 51142                     |
| <i>Thiobacillus denitrificans</i> ATCC 25259         |
| <i>Escherichia coli</i> str. K-12 substr. W3110      |
| <i>Listeria welshimeri</i> serovar 6b str. SLCC5334  |

**Supplementary Table 2** Parameter settings

| minPts (DBSCAN) | epsilon (DBSCAN) | perplexity (BH-tSNE) | theta (BH-tSNE) | dims (BH-tSNE) |
|-----------------|------------------|----------------------|-----------------|----------------|
| 8               | 0.02             | 40                   | 0.5             | 2              |

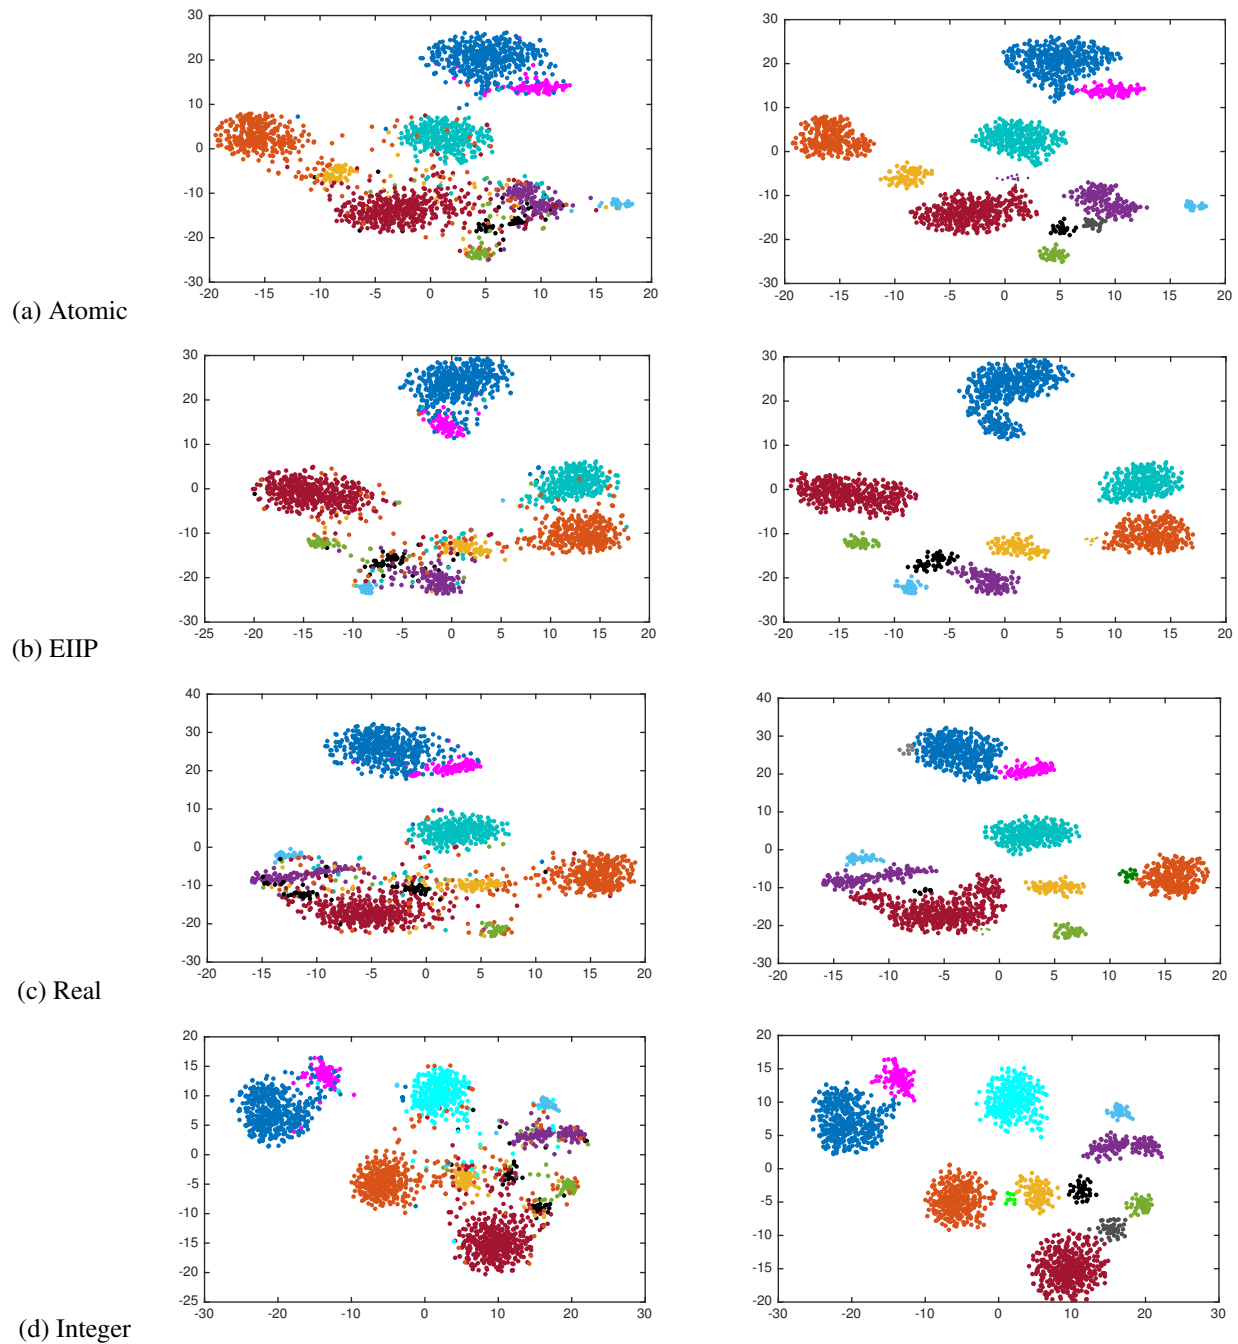

- *R. palustris* CGA009
- *N. meningitidis* MC58
- *B. clausii* KSM-K16
- *S. aureus* subsp. aureus NCTC
- *M. maripaludis* C7
- *L. intracellularis* PHE/MN1-00
- *C. sp.* ATCC 51142
- *T. denitrificans* ATCC
- *E. coli* str. K-12 substr. W3110
- *L. welshimeri* serovar 6b str. SLCC5334

**Supplementary Fig. 1** Visualisation of the simulated metagenomic community by considering various nucleotide mappings. (a) Atomic, (b) EIIP, (c) Real, and (d) Integer representation methods. Each colour represents a different species (see key) on the left side and a cluster defined by our approach on the right hand side figures.

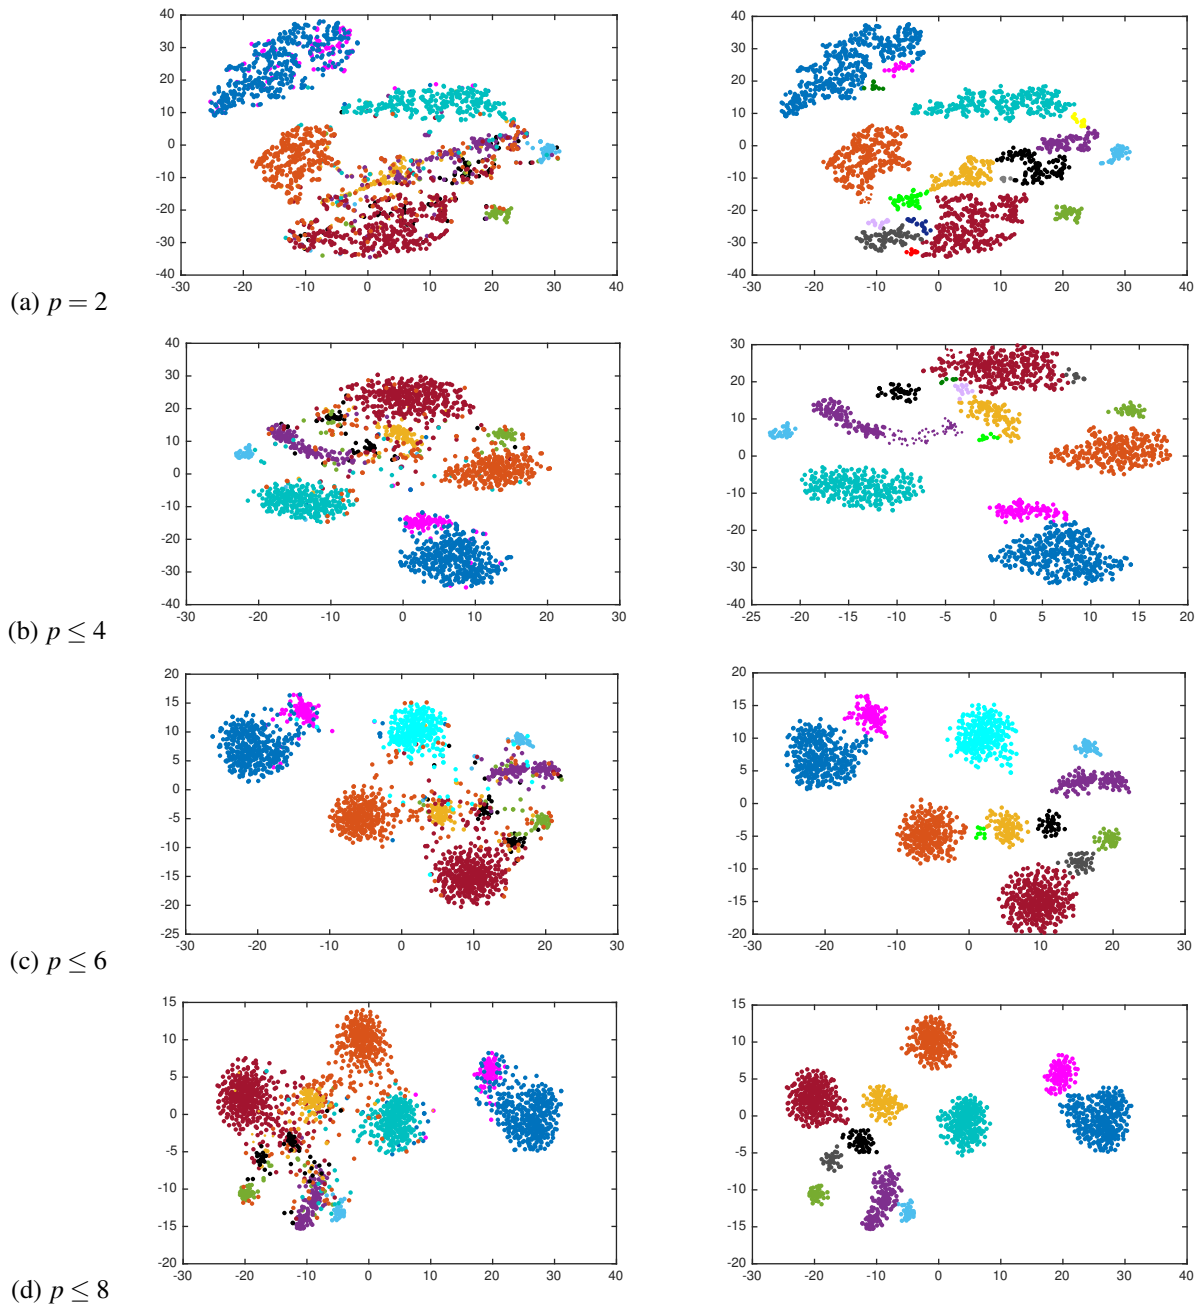

**Supplementary Fig. 2** Visualisation of the simulated metagenomic community by considering various MLBP window lengths (a)  $p = 2$ , (b)  $p \leq 4$ , (c)  $p \leq 6$ , and (e)  $p \leq 8$ . Each colour represents a different species (see Figure 1 for key) on the left side and a cluster defined by our approach on the right hand side figures.

## 100 Genomes Metagenomic Data

Supplementary Table 3 The 100 genomes simulated data used in Results and Discussion.

| Bacterial species                                 |
|---------------------------------------------------|
| <i>Sulfurimonas autotrophica</i> DSM 16294        |
| <i>Synechococcus elongatus</i> PCC 6301           |
| <i>Borrelia afzelii</i> PKo                       |
| <i>Paenibacillus</i> JDR 2                        |
| <i>Amycolobicoccus subflavus</i> DQS3 9A1         |
| <i>Mobiluncus curtisii</i> ATCC 43063             |
| <i>Clostridium</i> SY8519                         |
| <i>Teredinibacter turnerae</i> T7901              |
| <i>Oligotropha carboxidovorans</i> OM5            |
| <i>Candidatus Vesicomysocius okutanii</i> HA      |
| <i>Bacillus amyloliquefaciens</i> FZB42           |
| <i>Aquifex aeolicus</i> VF5                       |
| <i>Helicobacter hepaticus</i> ATCC 51449          |
| <i>Prevotella ruminicola</i> 23                   |
| <i>Nitrosopumilus maritimus</i> SCM1              |
| <i>Methanococcus maripaludis</i> X1               |
| <i>Idiomarina loihiensis</i> L2TR                 |
| <i>Olsenella uli</i> DSM 7084                     |
| <i>Dehalococcoides</i> BAV1                       |
| <i>Acinetobacter oleivorans</i> DR1               |
| <i>Rhodoferrax ferrireducens</i> T118             |
| <i>Prochlorococcus marinus</i> MIT 9211           |
| <i>Shewanella</i> ANA 3                           |
| <i>Hyphomonas neptunium</i> ATCC 15444            |
| <i>Rothia dentocariosa</i> ATCC 17931             |
| <i>Xylella fastidiosa</i> M12                     |
| <i>Clostridium botulinum</i> Ba4 657              |
| <i>Francisella tularensis</i> mediasiatica FSC147 |
| <i>Odoribacter splanchnicus</i> DSM 20712         |
| <i>Halanaerobium hydrogeniformans</i>             |
| <i>Streptococcus gallolyticus</i> UCN34           |
| <i>Riemerella anatipestifer</i> ATCC 11845        |
| <i>Prochlorococcus marinus</i> MIT 9215           |
| <i>Clostridium difficile</i> R20291               |
| <i>Desulfatibacillum alkenivorans</i> AK 01       |
| <i>Thermoanaerobacter italicus</i> Ab9            |
| <i>Archaeoglobus profundus</i> DSM 5631           |
| <i>Sinorhizobium medicae</i> WSM419               |
| <i>Staphylothermus hellenicus</i> DSM 12710       |
| <i>Pyrococcus horikoshii</i> OT3                  |
| <i>Psychrobacter cryohalolentis</i> K5            |
| <i>Geobacillus</i> Y412MC61                       |
| <i>Burkholderia phymatum</i> STM815               |
| <i>Desulfovibrio vulgaris</i> Hildenborough       |
| <i>Thermococcus sibiricus</i> MM 739              |
| <i>Roseobacter denitrificans</i> OCh 114          |
| <i>Synechococcus</i> CC9605                       |
| <i>Helicobacter pylori</i> P12                    |
| <i>Acidimicrobium ferrooxidans</i> DSM 10331      |

|                                                        |
|--------------------------------------------------------|
| Bacterial species                                      |
| <i>Aliivibrio salmonicida</i> LFI1238                  |
| <i>Sulfolobus islandicus</i>                           |
| <i>Chlorobium luteolum</i> DSM 273                     |
| <i>Cellulophaga lytica</i> DSM 7489                    |
| <i>Haloferax volcanii</i> DS2                          |
| <i>Amycolatopsis mediterranei</i> U32                  |
| <i>Rhodopseudomonas palustris</i> HaA2                 |
| <i>Methanocaldococcus vulcanius</i> M7                 |
| <i>Lacinutrix</i>                                      |
| <i>Parvibaculum lavamentivorans</i> DS 1               |
| <i>Salmonella enterica</i> serovar Typhi CT18          |
| <i>Rhodopseudomonas palustris</i> BisA53               |
| <i>Pseudomonas syringae</i> B728a                      |
| <i>Leifsonia xyli</i> CTCB07                           |
| <i>Streptomyces violaceusniger</i> Tu 4113             |
| <i>Klebsiella variicola</i>                            |
| <i>Chlorobium phaeobacteroides</i> DSM 266             |
| <i>Brucella suis</i> ATCC 23445                        |
| <i>Dickeya zeae</i> Ech1591                            |
| <i>Laribacter hongkongensis</i> HLHK9                  |
| <i>Halorhabdus utahensis</i> DSM 12940                 |
| <i>Pseudomonas fluorescens</i> Pf 5                    |
| <i>Serratia plymuthica</i> AS9                         |
| <i>Salmonella enterica</i> serovar Heidelberg SL476    |
| <i>Chlorobium chlorochromatii</i> CaD3                 |
| <i>Burkholderia glumae</i> BGR1                        |
| <i>Acinetobacter ADP1</i>                              |
| <i>Candidatus Moranella endobia</i> PCIT               |
| <i>Leptospira interrogans</i> serovar Lai 56601        |
| <i>Variovorax paradoxus</i> EPS                        |
| <i>Thioalkalivibrio K90mix</i>                         |
| <i>Yersinia enterocolitica</i> palearctica             |
| <i>Candidatus Amoebophilus asiaticus</i> 5a2           |
| <i>Rhodobacter sphaeroides</i> ATCC 17025              |
| <i>Coxiella burnetii</i> RSA 493                       |
| <i>Haemophilus influenzae</i> PittGG                   |
| <i>Methylomicrobium alcaliphilum</i>                   |
| <i>Haloarcula hispanica</i> ATCC 33960                 |
| <i>Escherichia coli</i> S88                            |
| <i>Neisseria gonorrhoeae</i> NCCP11945                 |
| <i>Delftia acidovorans</i> SPH 1                       |
| <i>Megasphaera elsdenii</i> DSM 20460                  |
| <i>Pseudomonas mendocina</i> ymp                       |
| <i>Salmonella enterica</i> serovar Paratyphi C RKS4594 |
| <i>Wolbachia endosymbiont</i> Drosophila melanogaster  |
| <i>Halomicrobium mukohataei</i> DSM 12286              |
| <i>Yersinia pestis</i> Pestoides F                     |
| <i>Yersinia pestis</i> CO92                            |
| <i>Escherichia coli</i> ATCC 8739                      |
| <i>Escherichia coli</i> K-12 substr MG1655             |
| <i>Neisseria gonorrhoeae</i> FA 1090                   |

#### Supplementary Table 4 Parameter settings

| minPts (DBSCAN) | epsilon (DBSCAN) | perplexity (BH-tSNE) | theta (BH-tSNE) | dims (BH-tSNE) |
|-----------------|------------------|----------------------|-----------------|----------------|
| 8               | 0.019            | 40                   | 0.5             | 3              |

**Supplementary Table 5** Number of contigs, their total length, and run time(s) for the simulated metagenomic data with 100 genomes.

| Number of contigs | Total length | Run time |
|-------------------|--------------|----------|
| 8977              | 343220185    | 904.95   |

## 4-mer as feature space

we provided a direct comparison of our results with 4-mers as the feature space in our pipeline. The results are shown for 10 and 100 genome datasets.

**Supplementary Table 6** Precision, recall, F1 score (%), and the number of clusters for 4-mer as the feature in our pipeline.

| Dataset     | Precision | Recall | F1 score | Number of clusters |
|-------------|-----------|--------|----------|--------------------|
| 10 genomes  | 96.14     | 70.80  | 81.54    | 13                 |
| 100 genomes | 95.32     | 69.56  | 80.43    | 98                 |

This shows our feature space (MLBP) performs better.

## Real Human Gut Metagenomic Data

#### Supplementary Table 7 Parameter settings

| minPts (DBSCAN) | epsilon (DBSCAN) | perplexity (BH-tSNE) | theta (BH-tSNE) | dims (BH-tSNE) |
|-----------------|------------------|----------------------|-----------------|----------------|
| 8               | 0.02             | 40                   | 0.5             | 2              |

## Drosophila Dataset

#### Supplementary Table 8 Parameter settings

| minPts (DBSCAN) | epsilon (DBSCAN) | perplexity (BH-tSNE) | theta (BH-tSNE) | dims (BH-tSNE) |
|-----------------|------------------|----------------------|-----------------|----------------|
| 8               | 0.013            | 40                   | 0.5             | 2              |

**Supplementary Table 9** Number of contigs, their total length, and run time(s).

| Number of contigs | Total length | Run time |
|-------------------|--------------|----------|
| 21984             | 120531818    | 2541.52  |

## Using the Software

### 1. 10genome dataset:

```
./MrGBP -fa raymeta_10.fasta
```

```
loading times: 1.54818
```

```
feature selection times: 44.9119
```

```
svd time: 0.349399
```

```
Using no_dims = 2, perplexity = 40.000000, and theta = 0.500000
```

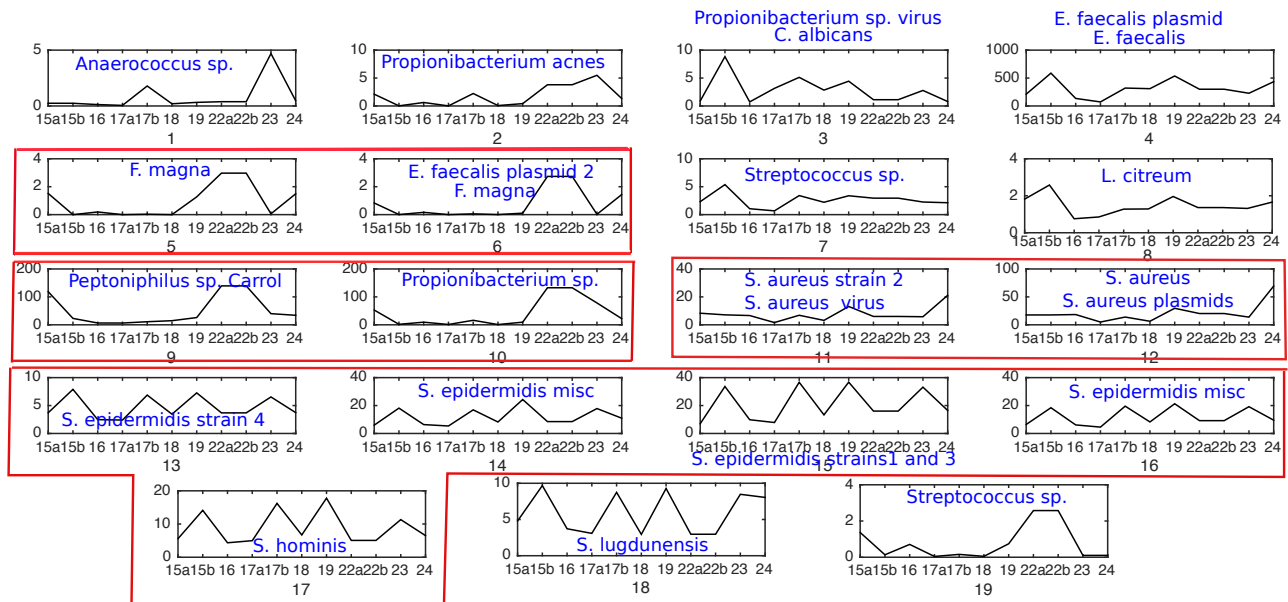

**Supplementary Figure 3** Longitudinal abundance patterns of the 19 identified clusters, see Figure 3. The associated species or groups of species are indicated for each cluster. The x-axis corresponds to the longitudinal sampling over nine days<sup>1</sup>. The y-axis corresponds to normalised read coverage. The red box indicate the correlated clusters across longitudinal samples.

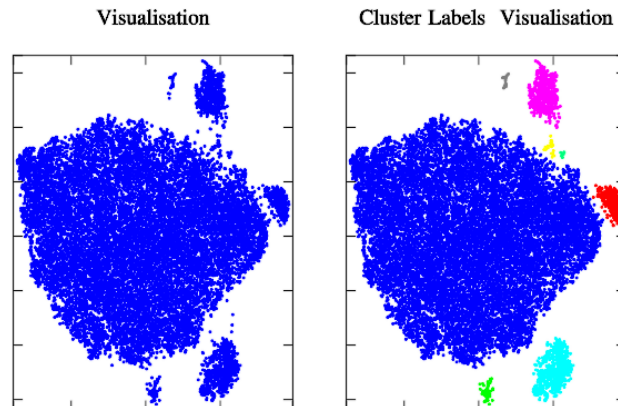

**Supplementary Figure 4** Each color shows a cluster defined by our approach on the right hand side figure.

Computing input similarities...  
 dimension reduction running time: 35.5877  
 clustering time: 12.056  
 -out: 12 clusters has been generated.

## 2. 100 genome dataset:

```

$./MrGBP -fa Contigs.fasta -no_dims 3
loading times: 60.9531
feature selection times: 492.094
svd time: 1.68903
Using no_dims = 3, perplexity = 40.000000, and theta = 0.500000
Computing input similarities...
dimension reduction running time: 334.805
  
```

clustering time: 236.07  
-out: 78 clusters has been generated.

**to have more clusters for the same dataset:**

```
$/MrGBP -fa Contigs.fasta -no_dims 3 -dbep 0.019
loading times: 58.967
feature selection times: 488.136
svd time: 1.64656
Using no_dims = 3, perplexity = 40.000000, and theta = 0.500000
Computing input similarities...
dimension reduction running time: 364.718
clustering time: 236.059
out: 116 clusters generated.
```

**3. CAMI low complexity dataset:**

```
$/MrGBP -fa gsa_anonymous.fasta -no_dims 3
loading times: 0.30396
feature selection times: 305.768
svd time: 1.4899
Using no_dims = 3, perplexity = 40.000000, and theta = 0.500000
Computing input similarities...
dimension reduction running time: 336.198
clustering time: 156.954
-out: 42 clusters has been generated.
```

**4. CAMI Medium Complexity dataset:**

```
$/MrGBP -fa pooled_gsa_anonymous.fasta -no_dims 3
loading times: 1.09978
feature selection times: 966.801
svd time: 4.62844
Using no_dims = 3, perplexity = 40.000000, and theta = 0.500000
Computing input similarities...
dimension reduction running time: 1677.8
clustering time: 1517.35
out: 51 clusters generated (Figure 5):
```

**to have more clusters for the same dataset:**

```
$/MrGBP -fa pooled_gsa_anonymous.fasta -no_dims 3 -dbep 0.016
loading times: 1.13176
feature selection times: 972.929
svd time: 4.89773
Using no_dims = 3, perplexity = 40.000000, and theta = 0.500000
Computing input similarities...
dimension reduction running time: 1551.57
clustering time: 1491.36
out: 154 clusters generated (Figure 6).
```

**5. Considering a different contigs minimum length:**

```
$/MrGBP -fa raymeta_10.fasta -mincl 400
loading times: 1.50128
feature selection times: 45.2874
svd time: 0.432179
Using no_dims = 2, perplexity = 40.000000, and theta = 0.500000
```



Computing input similarities...  
dimension reduction running time: 45.5465  
clustering time: 15.6797

## Parameter Setting:

1. Numerical representation of nucleotide sequences: various data representations can affect the results (Supplementary Figure 1 and table 2). It shows that Integer representation has better performance and has been set as the default for the online code.
2. MLBP window length that affects the feature length: Longer feature space may improve the performance similar to other applications. However, increasing the feature length increases the computational complexity/run time (Supplementary Figure 2 and Table 3).
3. Dimension reduction steps using (1) SVD considering various number of eigen factors (Figure 4 and Table 4) and (2) BH-tSNE where the default parameters have been considered except for suggesting keeping 3 dimensions for more complex data can improve the results. Moreover, a review on BH-tSNE parameter settings can be found at: <http://distill.pub/2016/misread-tsne/>
4. DBSCAN parameters: It has two parameters (1) epsilon that indicates the closeness of the points of each cluster to each other and (2) minPts, the minimum neighbours a point should have to be considered into a cluster. Usually these values are not known prior to analysis and there are several ways to select their values. One way is to calculate the distance of each point to its closest nearest neighbour and use the histogram of distances to select epsilon. After selecting epsilon a histogram can be obtained of the average number of neighbours for each point using the epsilon. Some of the samples do not have enough neighbouring points and can be considered as noise. Implementation of the parameter selection is included in spark dbscan ([https://github.com/alitouka/spark\\_dbscan](https://github.com/alitouka/spark_dbscan)). Here, we consider minPts = 8 and epsilon = 0.02 but to have more clusters our suggestion is to reduce epsilon. Visualisation can help to decide if the clusters are satisfactory otherwise the parameters can change.

Moreover, for multi-sample real datasets the coverage information have been added. Consequently, we believe our method does not need many samples to run. Our method performs better for low/medium datasets and also if there is noisy sequences.

## References

1. Sharon, I. *et al.* Time series community genomics analysis reveals rapid shifts in bacterial species, strains, and phage during infant gut colonization. *Genome research* **23**, 111–120 (2013).
